# Supplementary material
Source: PubMed Central journal article supplement (PMC9896406)
Supplement: EIJ-D-21-00343_Rajkumar_SD.pdf [file EIJ-D-21-00343_Rajkumar_SD.pdf]

## Supplementary data

### Supplementary Appendix 1. Details of PubMed search terms

We performed a structured search of PubMed to identify trials which randomly assigned patients to mechanical thrombectomy or control on a background of medical therapy which could include thrombolysis where eligible. We applied limits on the available dates from 1 January 2010 to 2 July 2020. No language restriction was applied.

The search string was as follows: randomised controlled trial [pt] OR controlled clinical trial [pt] OR randomised [tiab] OR placebo [tiab] OR drug therapy [sh] OR randomly [tiab] OR trial [tiab] OR groups [tiab] NOT (animals [mh] NOT humans [mh]) AND ((thrombectomy [tiab]) OR (clot retrieval [tiab]) OR intraarterial[tiab]) AND (stroke[tiab]).

### Supplementary Appendix 2. Supplementary results

With the addition of these three trials, there were a total of 3,694 patients, of whom 1,955 were randomised to thrombectomy and 1,739 to control.

Including these data, thrombectomy reduced disability at 90 days assessed using the mRS (OR 0.64, 95% CrI 0.57 to 0.72,  $pr < 0.0001$ ) (**Supplementary Figure 2A**). The reduction in all-cause mortality with thrombectomy was less certain (OR 0.88, 95% CrI 0.73 to 1.04,  $pr=0.070$ ) (**Supplementary Figure 2B**). Finally, the odds of SIH were similar between the two groups (OR 1.11, 95% CrI 0.81 to 1.51,  $pr=0.74$ ) (**Supplementary Figure 2C**).

**Supplementary Table 1. Impact of setting increasingly flat priors for the  $\beta$  coefficients for the primary outcome (mRS score at 90 days).**

| <b>SD of prior<br/>(normal distribution)</b> | <b>Odds of a higher mRS score with<br/>thrombectomy</b> |
|----------------------------------------------|---------------------------------------------------------|
| 0.25                                         | OR 0.99 (95% CrI 0.97 to 1.01)                          |
| 1                                            | OR 0.86 (95% CrI 0.80 to 0.92)                          |
| 10                                           | OR 0.54 (95% CrI 0.47 to 0.61)                          |
| 100                                          | OR 0.52 (95% CrI 0.45 to 0.60)                          |
| 10000                                        | OR 0.52 (95% CrI 0.46 to 0.60)                          |

mRS: modified Rankin Scale; OR: odds ratio; SD: standard deviation

**Supplementary Table 2. Impact of setting increasingly flat priors for the random effect on primary outcome (mRS score at 90 days).**

| <b>Mean of prior<br/>(exponential<br/>distribution)</b> | <b>Odds of a higher mRS score with<br/>thrombectomy</b> |
|---------------------------------------------------------|---------------------------------------------------------|
| 10                                                      | OR 0.53 (95% CrI 0.45 to 0.60)                          |
| 1                                                       | OR 0.53 (95% CrI 0.46 to 0.60)                          |
| 0.25                                                    | OR 0.52 (95% CrI 0.46 to 0.60)                          |
| 0.1                                                     | OR 0.53 (95% CrI 0.46 to 0.61)                          |

mRS: modified Rankin Scale; OR: odds ratio; SD: standard deviation

**Supplementary Table 3.**  
**Impact of setting increasingly flat priors for the  $\beta$  coefficients for the endpoint of mortality.**

| <b>SD of prior<br/>(normal distribution)</b> | <b>Odds of a higher risk of mortality<br/>with thrombectomy</b> |
|----------------------------------------------|-----------------------------------------------------------------|
| 0.25                                         | OR 1.00 (95% CrI 0.98 to 1.02)                                  |
| 1                                            | OR 0.97 (95% CrI 0.90 to 1.04)                                  |
| 10                                           | OR 0.82 (95% CrI 0.67 to 1.00)                                  |
| 100                                          | OR 0.81 (95% CrI 0.65 to 0.99)                                  |
| 10000                                        | OR 0.81 (95% CrI 0.66 to 0.99)                                  |

OR: odds ratio; SD: standard deviation

**Supplementary Table 4. Impact of setting increasingly flat priors for the random effect on the endpoint of mortality.**

| <b>Mean of prior<br/>(exponential<br/>distribution)</b> | <b>Odds of a higher risk of mortality<br/>with thrombectomy</b> |
|---------------------------------------------------------|-----------------------------------------------------------------|
| 10                                                      | OR 0.81 (95% CrI 0.66 to 0.99)                                  |
| 1                                                       | OR 0.81 (95% CrI 0.66 to 0.99)                                  |
| 0.25                                                    | OR 0.81 (95% CrI 0.66 to 1.00)                                  |
| 0.1                                                     | OR 0.81 (95% CrI 0.66 to 1.00)                                  |

OR: odds ratio; SD: standard deviation

**Supplementary Table 5. Cochrane risk of bias assessment tool for included studies.**

| <b>Trial</b>   | <b>Random sequence allocation</b>                                                                                                         | <b>Allocation concealment</b> | <b>Blinding of participants and personnel</b> | <b>Blinding of outcome assessment</b>                                                                                                                                                                                                                             | <b>Incomplete outcome data</b>                                                                                                                                                                                                                                                                                                                                                          | <b>Selective reporting</b>                           | <b>Overall quality</b>                                                                                           |
|----------------|-------------------------------------------------------------------------------------------------------------------------------------------|-------------------------------|-----------------------------------------------|-------------------------------------------------------------------------------------------------------------------------------------------------------------------------------------------------------------------------------------------------------------------|-----------------------------------------------------------------------------------------------------------------------------------------------------------------------------------------------------------------------------------------------------------------------------------------------------------------------------------------------------------------------------------------|------------------------------------------------------|------------------------------------------------------------------------------------------------------------------|
| ESCAPE [20]    | Low risk<br><br>“A real-time, dynamic, internet-based, randomised minimisation procedure (minimal sufficient balance method)”             | Unclear                       | High risk<br><br>Open label trial             | Low risk<br><br>“The primary outcome was assessed by trained personnel who were unaware of the treatment-group assignments”                                                                                                                                       | Low risk<br><br>One patient removed due to improper consent just after randomisation. One patient was lost to follow-up in the intervention arm and three patients were lost to follow-up in the control arm.                                                                                                                                                                           | Low risk<br><br>Most endpoints on CT.gov reported.   | High<br><br>Well conducted open-label trial with outcomes assessed by personnel unaware of treatment assignment. |
| EXTEND-IA [21] | Low risk<br><br>“Patients were randomised - by means of a centralised website and stratified according to the site of arterial occlusion” | Unclear                       | High risk<br><br>Open label trial             | Low risk<br><br>“Neurological impairment and functional scores were measured by a clinician trained in their administration and blinded to treatment assignment”                                                                                                  | Low risk<br><br>Eight patients in the intervention arm did not receive intervention (2 patients did not have angiogram performed due to change in their clinical status, 4 had no retrievable thrombus remaining on first angiographic run, 1 had mTICI 2b flow after stenting of extracranial ICA, 1 patient had vessel perforation and extravasation with microcatheter manipulation) | Low risk<br><br>All endpoints on CT.gov reported.    | High<br><br>Well conducted open-label trial with outcomes assessed by personnel unaware of treatment assignment. |
| MR CLEAN [22]  | Low risk<br><br>“The randomisation procedure was Web-based, with the use of permuted blocks”                                              | Unclear                       | High risk<br><br>Open label trial             | Low risk<br><br>“A single experienced trial investigator, who was unaware of the treatment-group assignments, conducted the follow-up interviews at 90 days by telephone with the patient, proxy, or healthcare provider. This interview provided reports for the | Low risk<br><br>2 patients declined participation after randomisation to control arm. 17 patients in the intervention arm did not undergo catheter angiogram (8 had clinical improvement before intervention, 6 protocol violations by local investigators, 1 had no femoral access, 1 withdrew consent for intervention, 1 was                                                         | Low risk<br><br>All pre-specified endpoints reported | High<br><br>Well conducted open-label trial with outcomes assessed by personnel unaware of treatment assignment  |

assessment of the modified Rankin score by reviewers who remained unaware of the treatment-group assignments.”

haemodynamically unstable. 20 patients in the intervention arm did not have intervention (10 had ICA disease, 8 had no clot visible, 2 technical problems)

|                  |                                                                                                                                                               |         |                               |                                                                                                                                                                                                       |                                                                                                                                                                                                                                                                                                                                                                                                                                                      |                                                                   |                                                                                                                                |
|------------------|---------------------------------------------------------------------------------------------------------------------------------------------------------------|---------|-------------------------------|-------------------------------------------------------------------------------------------------------------------------------------------------------------------------------------------------------|------------------------------------------------------------------------------------------------------------------------------------------------------------------------------------------------------------------------------------------------------------------------------------------------------------------------------------------------------------------------------------------------------------------------------------------------------|-------------------------------------------------------------------|--------------------------------------------------------------------------------------------------------------------------------|
| PISTE [7]        | Low risk<br>“Randomisation was conducted using an interactive voice-response system managed by the Robertson Centre for Biostatistics, University of Glasgow” | Unclear | High risk<br>Open label trial | Low risk<br>“Day 90 outcomes were assessed by site staff blinded to treatment allocation”                                                                                                             | Low risk<br>3 patients in the intervention arm did not receive intervention (2 had more than 33% disease in MCA territory, 1 patient had treatment crossover). 4 patients in the control arm did receive IVT alone (1 patient had an ineligible CTA occlusion, 1 had more than 33% disease in MCA territory, 1 patient had mRS >2 on review, 1 patient had treatment crossover). In the control arm, two patients were lost to follow-up at 90 days. | Low risk<br>All endpoints on CT.gov reported.                     | High<br>Well conducted open-label trial with outcomes assessed by personnel unaware of treatment assignment                    |
| REVASCAT [23]    | Low risk<br>“a real-time computerised randomisation procedure” with stratification.                                                                           | Unclear | High risk<br>Open label trial | Low risk<br>“Local and external certified assessors who were unaware of study-group assignments separately evaluated the primary outcome variable in each patient by means of a structured interview” | Low risk<br>One patient withdrew consent just after randomisation. 33 patients in the intervention arm and 23 patients in the control arm did not receive tPA. Five patients in the intervention arm did not undergo intervention (3 had TIC1 3 and 2 had TIC1 2b perfusion score)                                                                                                                                                                   | Low risk<br>All endpoints on CT.gov reported in primary analysis. | High<br>Well conducted open-label trial with outcomes assessed by local and external assessors unaware of treatment assignment |
| SWIFT PRIME [24] | Low risk<br>“Subject allocation to treatment will be accomplished by using                                                                                    | Unclear | High risk<br>Open label trial | Low risk<br>“The 90-day mRS was assessed by study personnel certified in the scoring of the mRS using the RFA-A, and                                                                                  | Low risk<br>11 patients in the intervention arm did not receive intervention (7 had complete or partial resolution of                                                                                                                                                                                                                                                                                                                                | Low risk<br>All endpoints on CT.gov reported                      | High<br>Well conducted open-label trial with outcomes                                                                          |

|             |                                                                                                                                                                                                                                                                                                                               |         |                  |                                                                                                                                                                            |                                                                                                                                                                                                                                                                                                                                                                                                                                                                                                                                    |                                                       |                                                                                                                      |
|-------------|-------------------------------------------------------------------------------------------------------------------------------------------------------------------------------------------------------------------------------------------------------------------------------------------------------------------------------|---------|------------------|----------------------------------------------------------------------------------------------------------------------------------------------------------------------------|------------------------------------------------------------------------------------------------------------------------------------------------------------------------------------------------------------------------------------------------------------------------------------------------------------------------------------------------------------------------------------------------------------------------------------------------------------------------------------------------------------------------------------|-------------------------------------------------------|----------------------------------------------------------------------------------------------------------------------|
|             | an interactive web response or interactive voice response system.                                                                                                                                                                                                                                                             |         |                  | blinded to treatment assignment”                                                                                                                                           | target occlusion, 2 had no target occlusion at the time of enrolment and 2 had inaccessible target occlusions).<br>Final assessment data were unavailable in 5 patients in the control arm (2 were withdrawn by the investigator after entry criteria deviation and 3 patients withdrew their consent)                                                                                                                                                                                                                             | in primary analysis.                                  | assessed by staff blinded to treatment assignment                                                                    |
| THRACE [18] | Low risk                                                                                                                                                                                                                                                                                                                      | Unclear | High risk        | High risk                                                                                                                                                                  | Low risk                                                                                                                                                                                                                                                                                                                                                                                                                                                                                                                           | Low risk                                              | Intermediate                                                                                                         |
|             | “Randomisation was done at the coordination centre by a computer analyst who was masked to the investigation centres and to the patients. Randomisation was done with a computer-generated sequence and was stratified by centre, and sequential minimisation with a factor of 85% was used to avoid imbalance in treatment.” |         | Open label trial | “Clinical assessments were done by vascular neurologists who were not masked to the treatment to which the patients had been allocated.”                                   | 2 patients withdrew consent after randomisation. 59 patients in the intervention arm did not have thrombectomy and 4 patients in the intervention group discontinued intervention because of catheterisation problems. 8 patients in the control arm eventually received intervention because of poor clinical evolution. 2 patients in the intervention arm and 2 patients in the control arm were lost to follow-up. 2 patients in the intervention arm and 4 patients in the control arm had missing data for efficacy analysis | All endpoints on CT.gov reported in primary analysis. | Well conducted open-label trial but absence of blinded adjudication of clinical assessments reduces quality of trial |
| THERAPY [6] | Low risk                                                                                                                                                                                                                                                                                                                      | Unclear | High risk        | Low risk                                                                                                                                                                   | Low risk                                                                                                                                                                                                                                                                                                                                                                                                                                                                                                                           | Low risk                                              | High                                                                                                                 |
|             | “Randomisation was performed through a centralised interactive voice response system”                                                                                                                                                                                                                                         |         | Open label trial | “The primary outcome measure (90-day mRS) was assessed by independent blinded adjudicators. Adjudicators reviewed videotapes of assessments performed by blinded, trained, | 3 patients in the intervention arm and 5 patients in the control arm were lost to follow-up. Two patients in the intervention arm and two patients in the control arm withdrew consent.                                                                                                                                                                                                                                                                                                                                            | All endpoints on CT.gov reported in primary analysis. | Well conducted open-label trial with outcomes assessed by staff blinded to treatment assignment                      |

|               |                                                                                                                                                                                                        |          |                  |                                                                                                                                                                                                                                                                                                                                                                                                                   |                                                                                                                                                |                                                       |                                                                                                                                                                                                          |              |
|---------------|--------------------------------------------------------------------------------------------------------------------------------------------------------------------------------------------------------|----------|------------------|-------------------------------------------------------------------------------------------------------------------------------------------------------------------------------------------------------------------------------------------------------------------------------------------------------------------------------------------------------------------------------------------------------------------|------------------------------------------------------------------------------------------------------------------------------------------------|-------------------------------------------------------|----------------------------------------------------------------------------------------------------------------------------------------------------------------------------------------------------------|--------------|
|               |                                                                                                                                                                                                        |          |                  | and certified local investigators. “<br>“SiCH was defined as any new haemorrhage identified by the core laboratory with a concomitant $\geq 4$ -point worsening in NIHSS as recorded by a blinded, NIHSS-certified assessor.”                                                                                                                                                                                     |                                                                                                                                                |                                                       |                                                                                                                                                                                                          |              |
| DAWN [9]      | Low risk                                                                                                                                                                                               | Unclear  | High risk        | Low risk                                                                                                                                                                                                                                                                                                                                                                                                          | Low risk                                                                                                                                       | Low risk                                              | Low risk                                                                                                                                                                                                 | Intermediate |
|               | “Randomisation was performed with the use of a central, Web-based procedure, with block minimisation processes to balance the two treatment groups, and was stratified according to mismatch criteria” |          | Open label trial | “For the coprimary endpoints, scores on the modified Rankin scale were obtained through in-person, formal, structured interviews with patients and caregivers that were performed by local certified assessors who were unaware of the treatment assignments.”<br><br>Safety endpoints, procedure-related complications, and serious adverse events were adjudicated by an independent clinical events committee. | Two patients in the intervention arm did not receive intervention due to spontaneous recanalisation of target vessel on conventional angiogram | All endpoints on CT.gov reported in primary analysis. | Well conducted open-label trial. Although safety endpoints were adjudicated by independent assessors, it is unclear if they were blinded to treatment allocation. This reduces the quality of the trial. |              |
| DEFUSE 3 [10] | Low risk                                                                                                                                                                                               | Low risk | High risk        | Low risk                                                                                                                                                                                                                                                                                                                                                                                                          | Low risk                                                                                                                                       | Low risk                                              | Low risk                                                                                                                                                                                                 | High         |
|               | “Randomisation - with the use of a Web-based dynamic randomisation system. Randomisation was stratified”                                                                                               |          | Open label trial | “The score (referring to mRS) was assessed in person, or by telephone if an in-person visit was not feasible, by a certified rater who was not aware of the trial-group assignments”                                                                                                                                                                                                                              | Two patients in the intervention group did not receive intervention due to intervention deemed unsafe/not feasible by the operator.            | All endpoints on CT.gov reported in primary analysis. | Well conducted open-label trial with outcomes assessed by independent staff, blinded to treatment assignment                                                                                             |              |
| RESILIENT [8] | Low risk                                                                                                                                                                                               | Unclear  | High risk        | Low risk                                                                                                                                                                                                                                                                                                                                                                                                          | Low risk                                                                                                                                       | Low risk                                              | Low risk                                                                                                                                                                                                 | High         |

|           |                                                                                                                                                                        |          |                  |                                                                                                                                                                                                                      |                                                                                                                                                                                                                                                                                                                                                  |                                                       |                                                                                                               |
|-----------|------------------------------------------------------------------------------------------------------------------------------------------------------------------------|----------|------------------|----------------------------------------------------------------------------------------------------------------------------------------------------------------------------------------------------------------------|--------------------------------------------------------------------------------------------------------------------------------------------------------------------------------------------------------------------------------------------------------------------------------------------------------------------------------------------------|-------------------------------------------------------|---------------------------------------------------------------------------------------------------------------|
|           | “Randomisation was performed through a real-time, dynamic, internet-based, randomised minimisation procedure to balance the numbers of patients across the two groups” |          | Open label trial | “Assessment was based on central adjudication by consensus of two certified neurologists, who were unaware of the treatment assignments and who viewed video recordings of structured patient or family interviews.” | In the intervention arm, 35 did not receive intravenous tPA and 31 patients in the control group did not receive intravenous alteplase. One person in the control group did not receive intervention. One patient in the control group was lost to follow-up                                                                                     | All endpoints on CT.gov reported in primary analysis. | Well conducted open-label trial with outcomes assessed by independent staff, blinded to treatment assignment  |
| EASI [19] | Low risk                                                                                                                                                               | Unclear  | High risk        | High risk                                                                                                                                                                                                            | Low risk                                                                                                                                                                                                                                                                                                                                         | Low risk                                              | Intermediate                                                                                                  |
|           | “Randomisation through a web-based application package. Minimisation was used as a method of adaptive stratified sampling”                                             | Low risk | Open label trial | “All data and outcome measures were collected by routine care personnel in this care trial design and thus no blinding was involved”                                                                                 | 10 patients in the intervention arm did not receive intervention (1 patient had no angiography due to aortic dissection, 4 patients had distal thrombus, 3 patients had no thrombus found and 2 patients had inaccessible basilar artery). Three patients in the control arm received intervention due to request from the neurologist or family | All endpoints on CT.gov reported in primary analysis. | Well conducted open label trial but lack of blinding for outcome evaluation reduces the quality of the trial. |



**Supplementary Table 6. Summary characteristics for trials added to the sensitivity analysis.**

| TRIAL<br>n<br>MT/CON                   | Journal | Year | Sites                                   | Median NIHSS<br>MT/CON | Max delay<br>EVT from<br>symptom<br>onset (hrs) | Imaging<br>modality for<br>inclusion | Proportion<br>received IV<br>thrombolytic<br>therapy<br>MT/CON | Protocol-<br>mandated<br>thrombectomy<br>technique                  | Symptom<br>onset to<br>groin<br>puncture<br>(mins) | Attempt with<br>any MT<br>device¶ | Proportion<br>of MT with<br>stent<br>retriever | Proportion<br>of MT with<br>aspiration<br>catheter | TICI<br>2b-3 at<br>procedure<br>end<br>(%) |
|----------------------------------------|---------|------|-----------------------------------------|------------------------|-------------------------------------------------|--------------------------------------|----------------------------------------------------------------|---------------------------------------------------------------------|----------------------------------------------------|-----------------------------------|------------------------------------------------|----------------------------------------------------|--------------------------------------------|
| MR RESCUE<br>[25]<br>64/54             | NEJM    | 2013 | 22 sites,<br>N. America                 | 16/19//16/20           | ≤8                                              | MRA or CTA                           | 43.8 / 29.6                                                    | Any FDA<br>approved device.<br>Merci retriever<br>(77%)             | 381±74                                             | 95.3<br>61/64                     | 0.0%<br>0/61                                   | 39.3%<br>24/61                                     | 25.0%<br>16/64                             |
| IMS III [26]<br>434/222                | NEJM    | 2013 | 58 sites, N.<br>America,<br>AUS, Europe | 17/16                  | <5                                              | NCCT                                 | 100 / 100                                                      | IA tPA‡ and/or<br>Merci (22%),<br>Penumbra (12%),<br>Solitaire (1%) | 208±47                                             | 39.2%<br>170/434                  | 8.2%<br>14/170                                 | 38.8%<br>66/170                                    | 39.6%<br>126/318                           |
| SYNTHESIS<br>Expansion [27]<br>181/181 | NEJM    | 2013 | 24 sites, Italy                         | 13/13                  | <6                                              | NCCT                                 | 0.0* / 98.3                                                    | IA tPA‡ +/- device<br>utilisation (31%)                             | 225<br>(194-250)                                   | 30.9%<br>56/181                   | 41%‡‡<br>23/56                                 | 16.1%<br>9/56                                      | Not specified                              |

¶ Figure for proportion of patients in the intervention group who received an attempt at EVT with a dedicated EVT device.

‡ Intra-arterial tPA administered through a microcatheter +/- mechanical clot disruption typically using a guidewire.

‡‡ Only Solitaire and Trevo devices reported.

\* Patients in the thrombectomy arm were eligible for intra-arterial thrombolysis at the discretion of the interventionalist.

CON: control arm; CTA: CT angiogram; DSA: digital subtraction angiography; dwMR: diffusion weighted magnetic resonance; INT:

intervention arm; MRA: magnetic resonance angiography; MT: mechanical thrombectomy; NCCT: non-contrast computed tomography; NIHSS:

National Institutes of Health Stroke Scale; TICI: Thrombolysis In Cerebral Infarction score

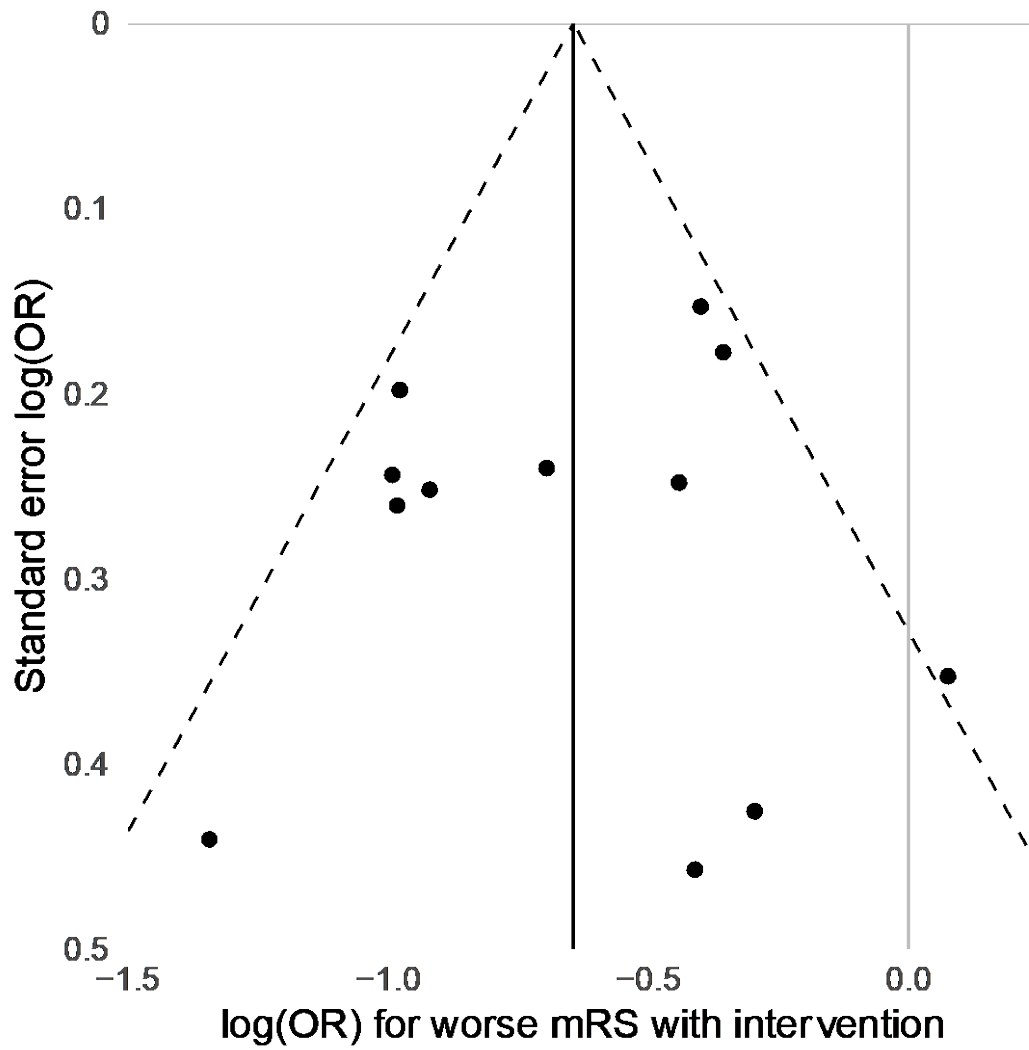

**Supplementary Figure 1.** Funnel plot.

Funnel plot demonstrating a low risk of publication bias for the primary endpoint across studies included in this meta-analysis (Egger's test,  $p=0.2$ ).

mRS: modified Rankin Scale score; OR: odds ratio

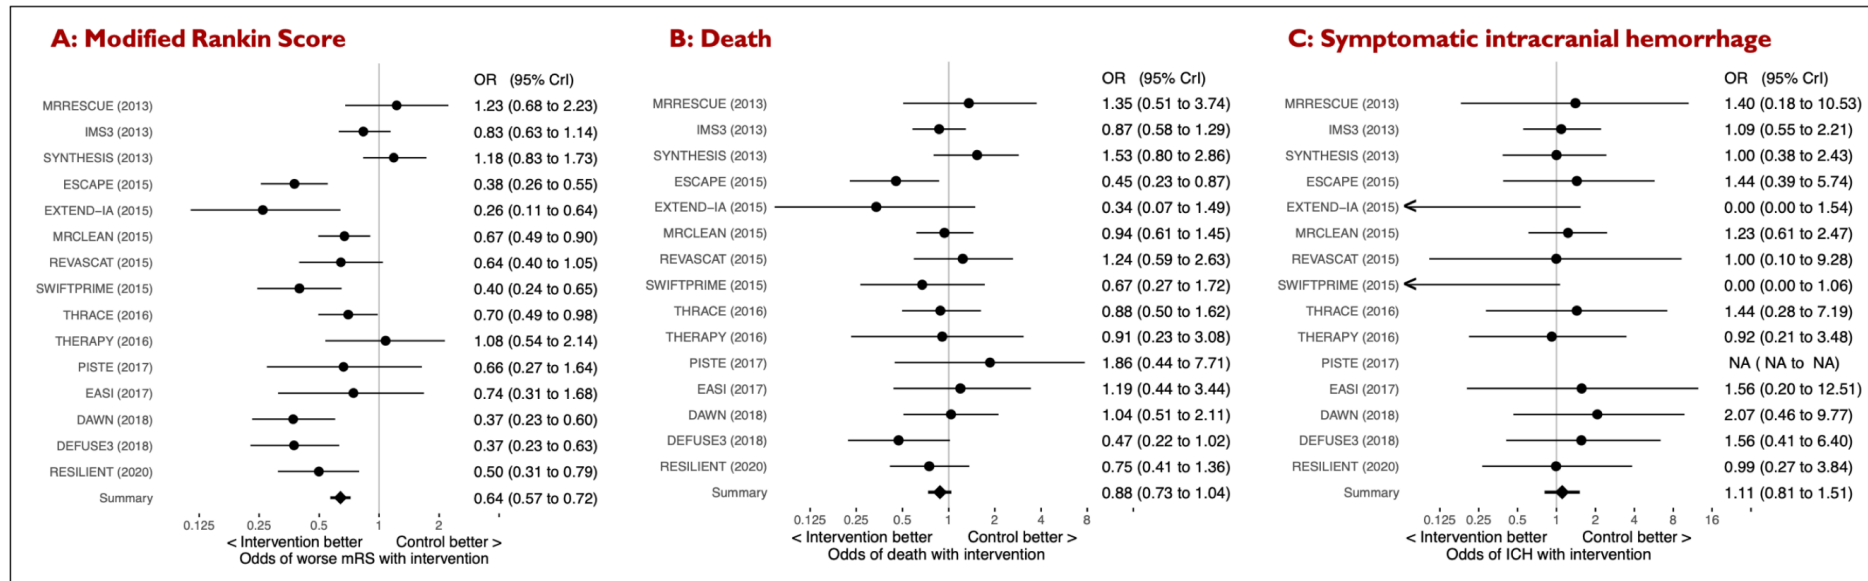

**Supplementary Figure 2.** Sensitivity analysis forest plots indicating the effect of mechanical thrombectomy versus control for the treatment of acute ischaemic stroke on 90-day outcomes of (A) modified Rankin Scale score, (B) all-cause mortality, and (C) symptomatic intracranial haemorrhage.

CrI: credible interval; mRS: modified Rankin Scale score; OR: odds ratio; ICH: intracranial haemorrhage

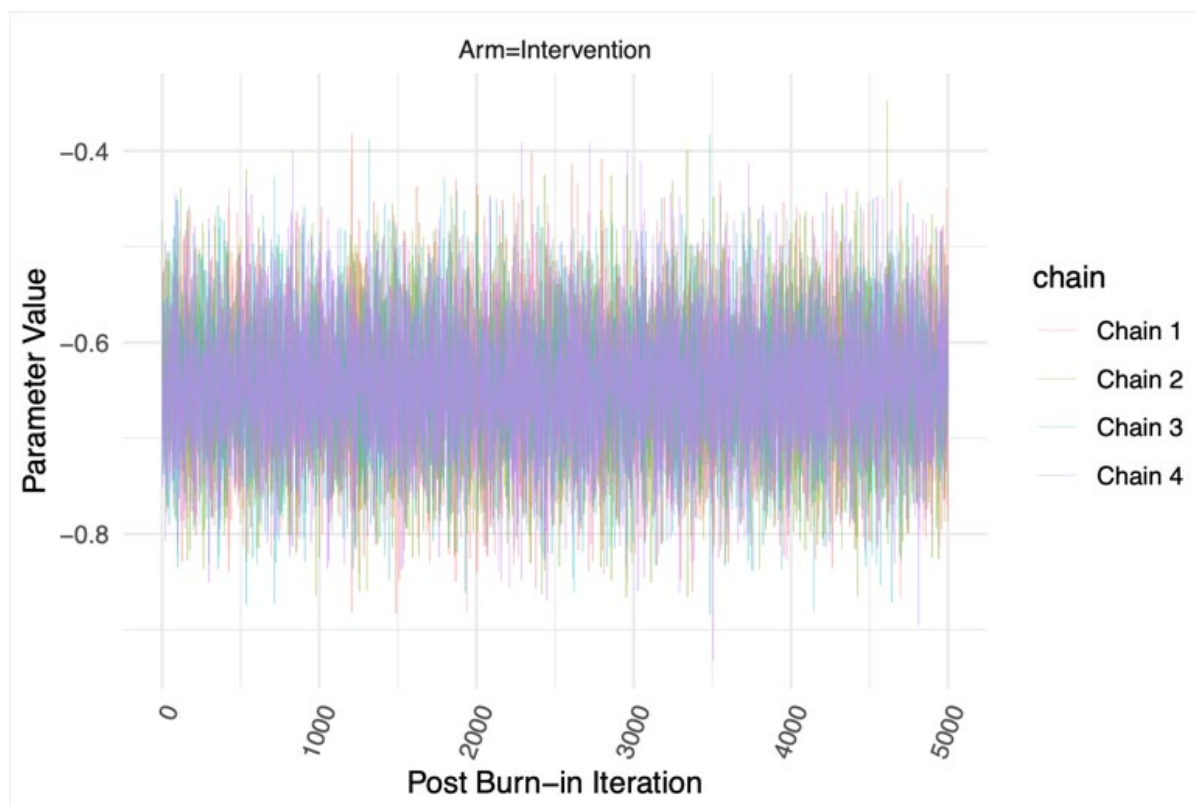

**Supplementary Figure 3A.** Sample diagnostic plot (mRS): trace.

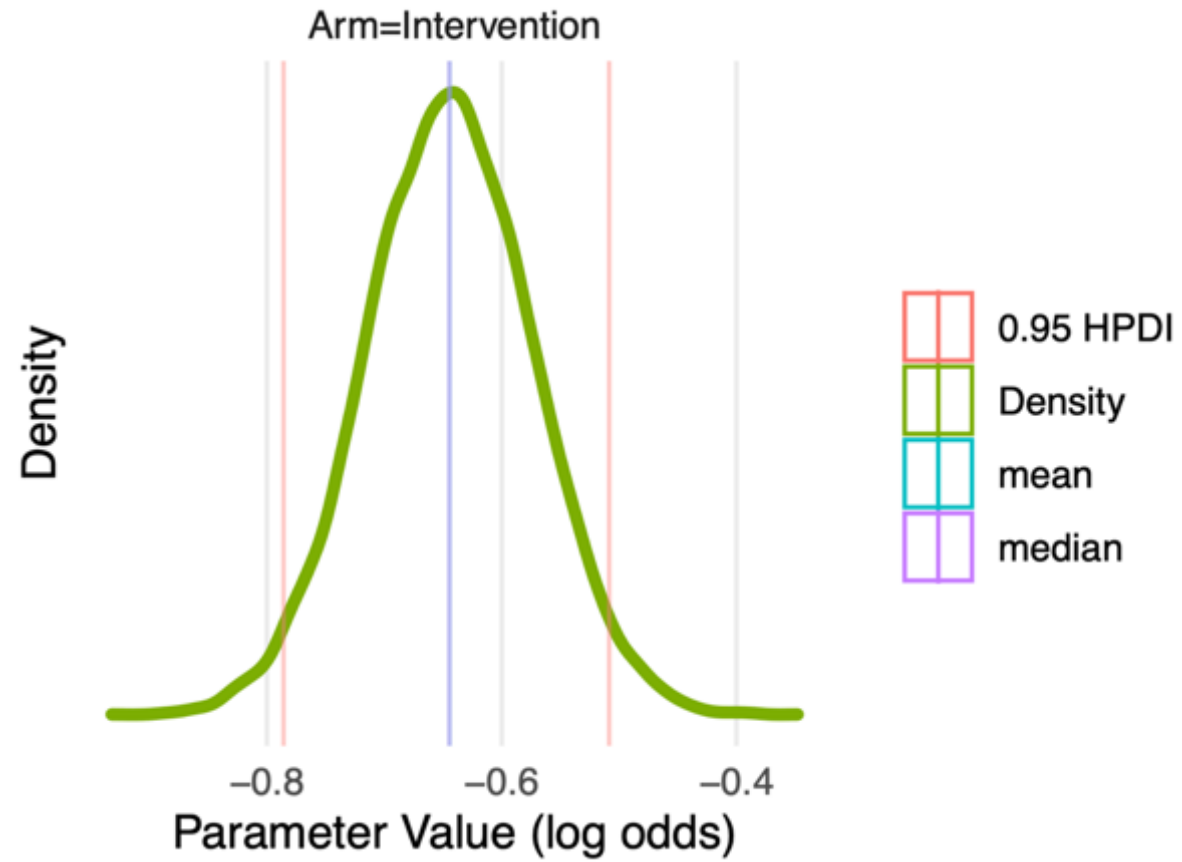

**Supplementary Figure 3B.** Sample diagnostic plot (mRS): density.

HPDI: highest posterior density interval

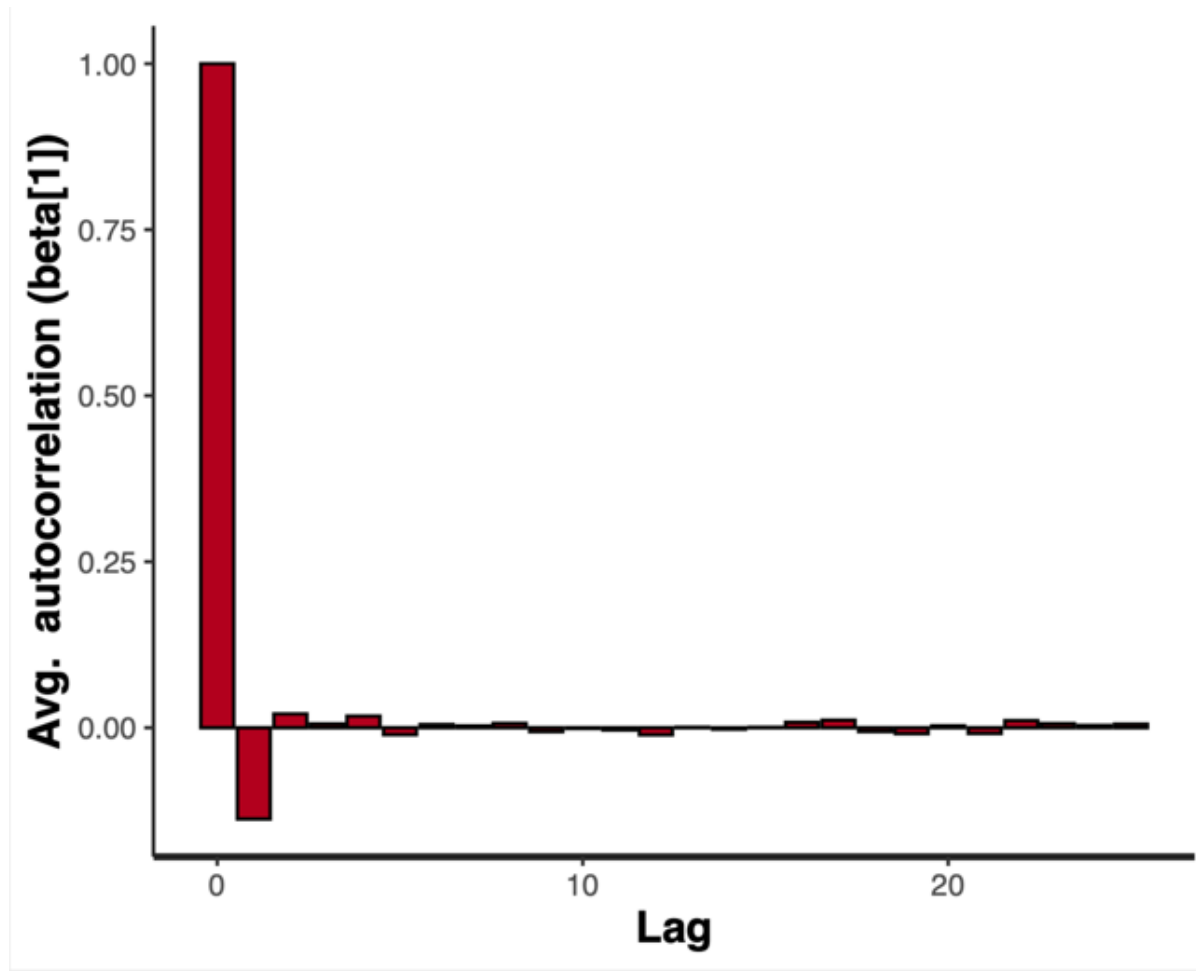

Supplementary Figure 3C. Sample diagnostic plot (mRS): autocorrelation.

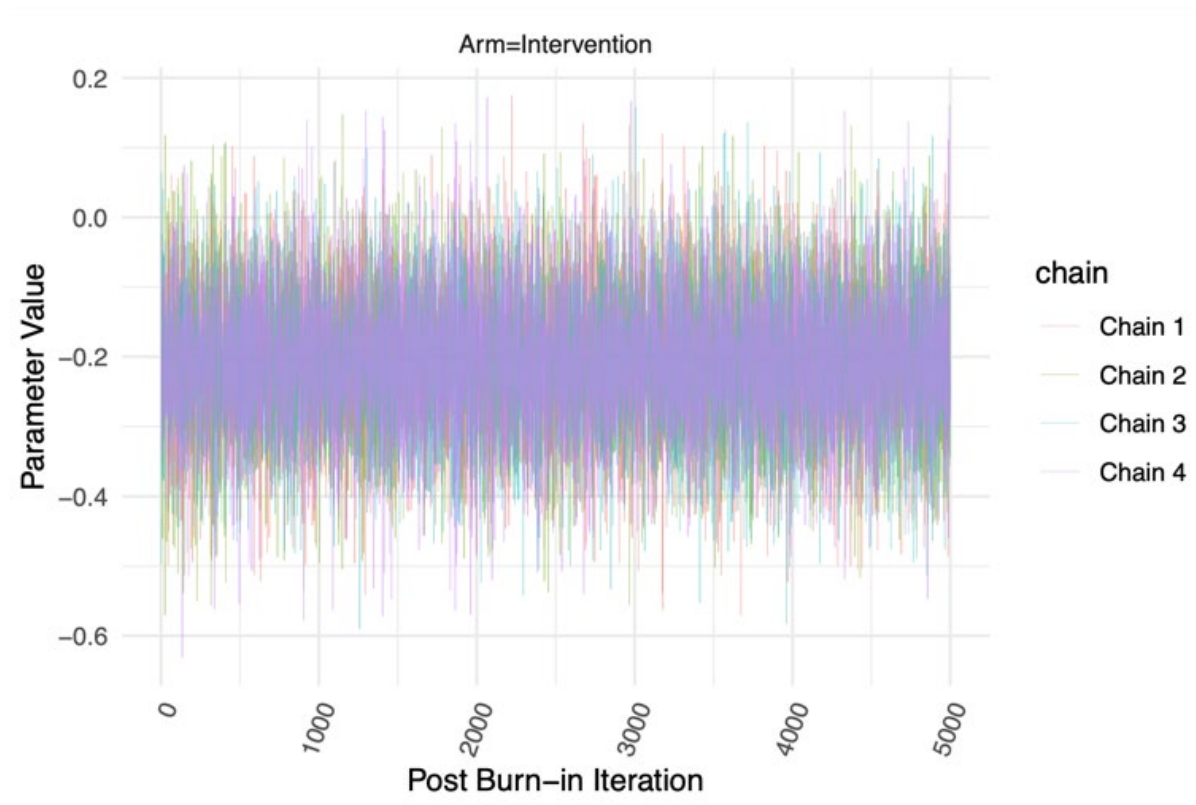

Supplementary Figure 4A. Sample diagnostic plot (death): trace.

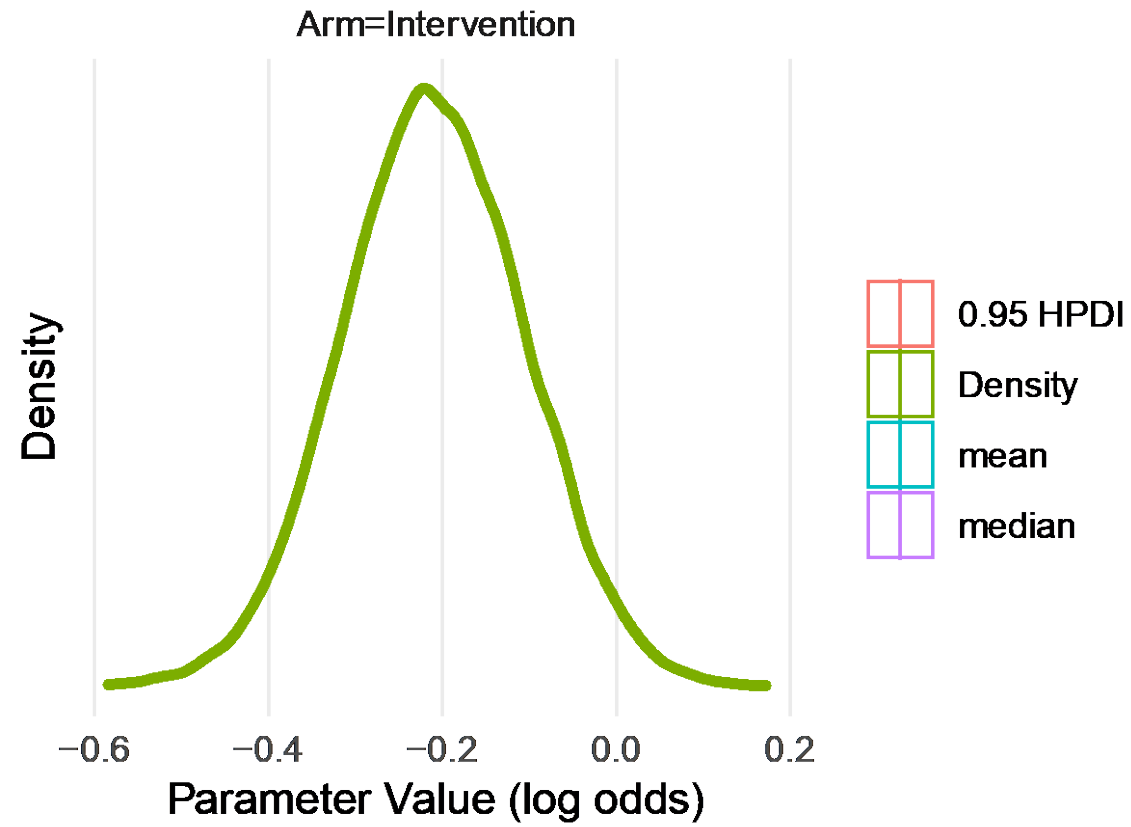

**Supplementary Figure 4B.** Sample diagnostic plot (death): density.  
HPDI: highest posterior density interval



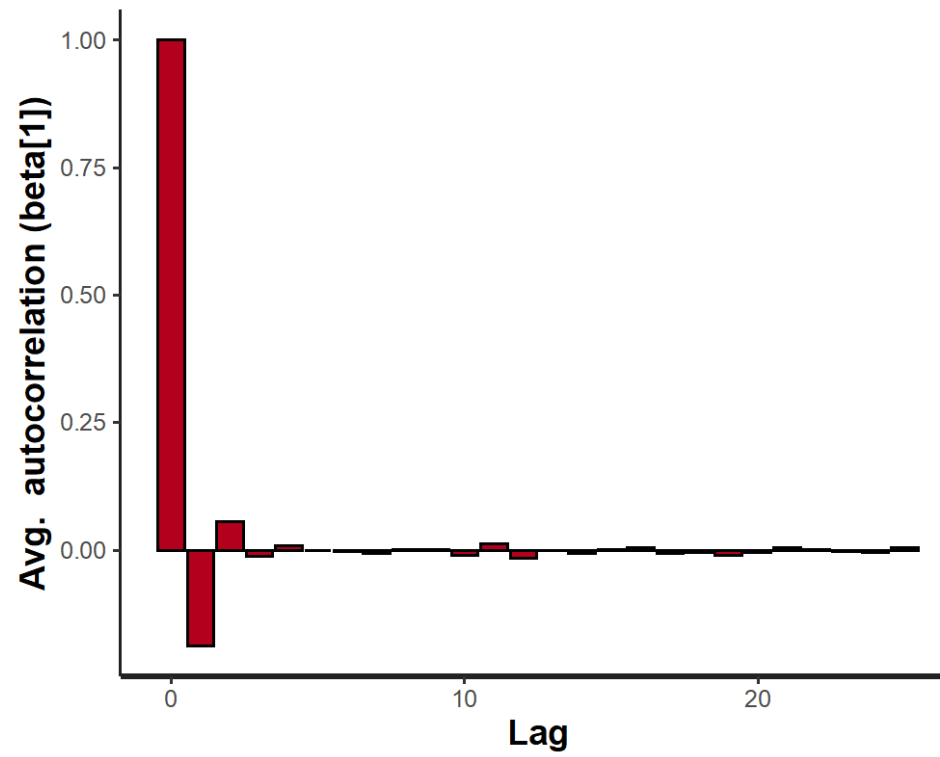

Supplementary Figure 4C. Sample diagnostic plot (death): autocorrelation.

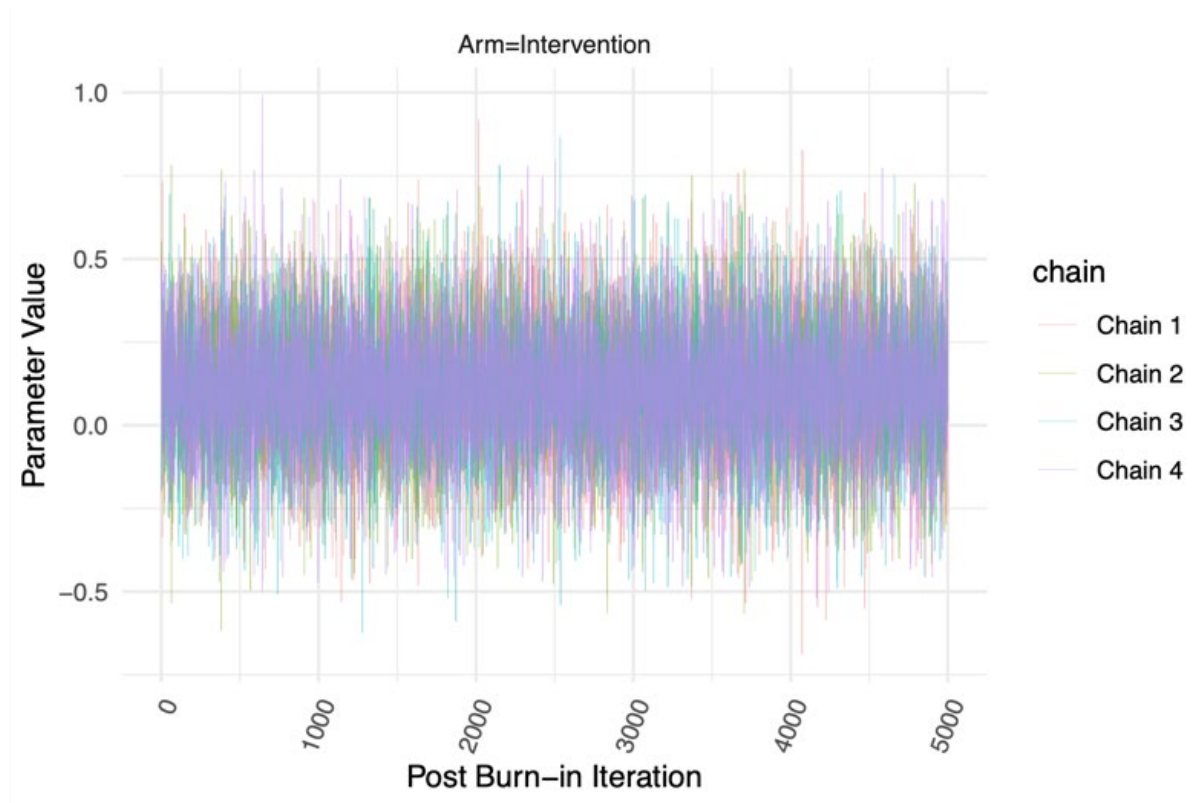

**Supplementary Figure 5A.** Sample diagnostic plot (symptomatic intracranial haemorrhage): trace.

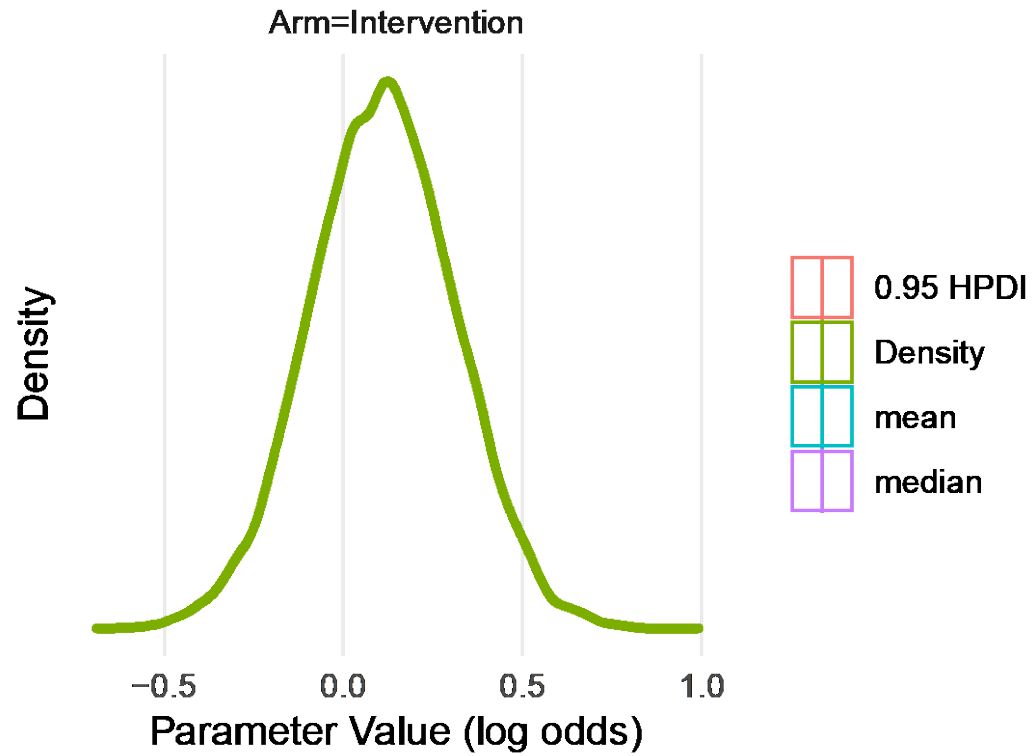

**Supplementary Figure 5B.** Sample diagnostic plot (symptomatic intracranial haemorrhage): density.

HPDI: highest posterior density interval

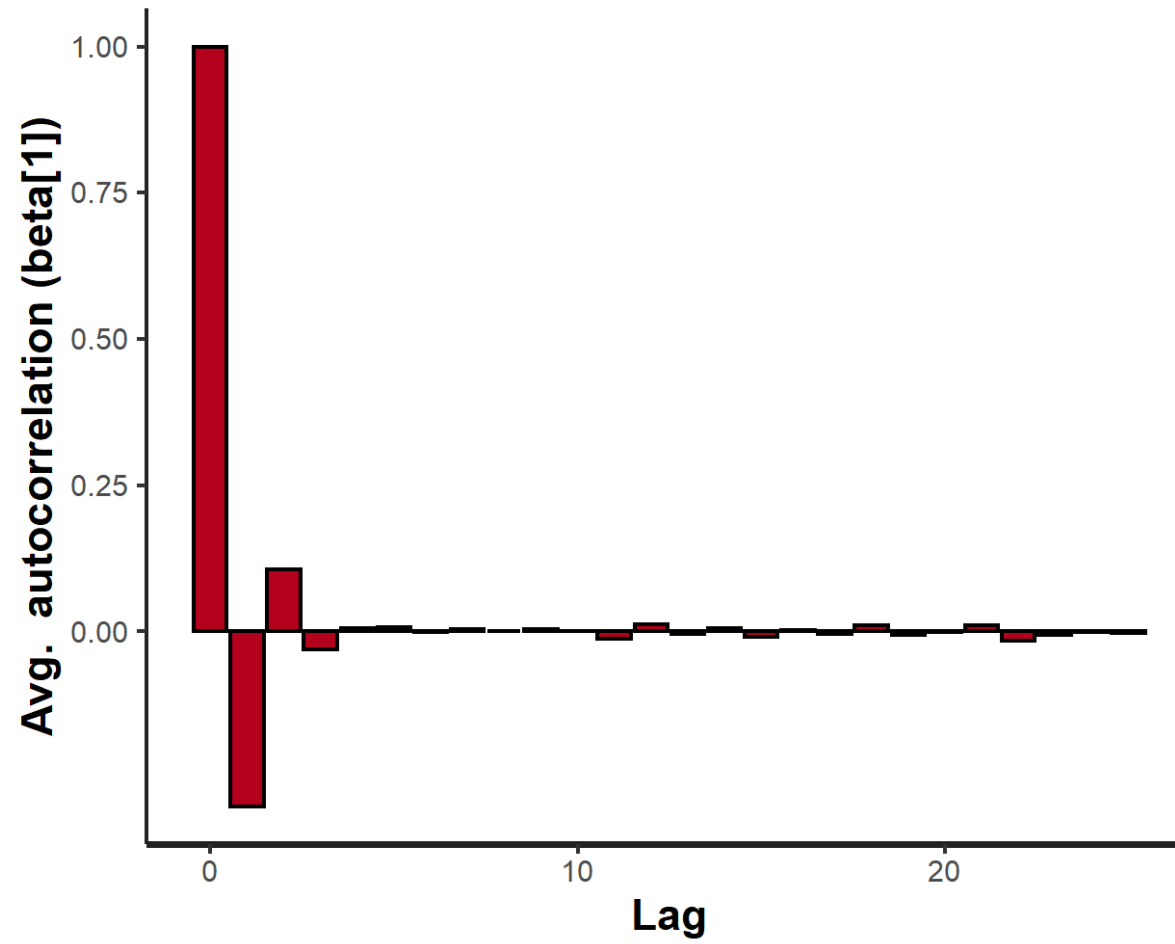

Supplementary Figure 5C. Sample diagnostic plot (symptomatic intracranial haemorrhage): autocorrelation.
